# Supplementary material for: Discovery of Antimicrobial Peptides That Can Accelerate Culture Diagnostics of Slow-Growing Mycobacteria Including Mycobacterium tuberculosis
Source: MDPI journal article supplement (doi:10.3390/microorganisms11092225), 2023-09-02
Supplement: s1 [file s1]

Supplement

Table S1

A

| Condition        | Day 1 | Day 5 | Day 8 | Day 12 | Day 15 | Day 19 | Day 22 |
|------------------|-------|-------|-------|--------|--------|--------|--------|
| MAP (control)    | 0.038 | 0.231 | 0.330 | 0.467  | 0.545  | 0.633  | 0.699  |
| MAP + Peptide 1  | 0.038 | 0.067 | 0.251 | 0.202  | 0.286  | 0.374  | 0.579  |
| MAP + Peptide 2  | 0.056 | 0.195 | 0.244 | 0.219  | 0.295  | 0.384  | 0.639  |
| MAP + Peptide 3  | 0.044 | 0.118 | 0.224 | 0.272  | 0.286  | 0.408  | 0.582  |
| MAP + Peptide 4  | 0.016 | 0.184 | 0.257 | 0.266  | 0.287  | 0.333  | 0.574  |
| MAP + Peptide 5  | 0.029 | 0.117 | 0.191 | 0.253  | 0.351  | 0.438  | 0.549  |
| MAP + Peptide 6  | 0.041 | 0.148 | 0.174 | 0.261  | 0.284  | 0.447  | 0.606  |
| MAP + Peptide 7  | 0.026 | 0.202 | 0.246 | 0.189  | 0.313  | 0.453  | 0.620  |
| MAP + Peptide 8  | 0.023 | 0.102 | 0.232 | 0.382  | 0.421  | 0.501  | 0.559  |
| MAP + Peptide 9  | 0.033 | 0.204 | 0.352 | 0.406  | 0.516  | 0.550  | 0.624  |
| MAP + Peptide 10 | 0.016 | 0.238 | 0.330 | 0.472  | 0.579  | 0.626  | 0.718  |
| MAP + Peptide 11 | 0.027 | 0.272 | 0.327 | 0.526  | 0.583  | 0.627  | 0.687  |
| MAP + Peptide 12 | 0.029 | 0.165 | 0.349 | 0.456  | 0.486  | 0.547  | 0.644  |
| MAP + Peptide 13 | 0.035 | 0.176 | 0.335 | 0.383  | 0.527  | 0.574  | 0.701  |
| MAP + Peptide 14 | 0.037 | 0.272 | 0.411 | 0.478  | 0.601  | 0.651  | 0.711  |
| MAP + Peptide 15 | 0.029 | 0.133 | 0.095 | 0.160  | 0.189  | 0.287  | 0.465  |
| MAP + Peptide 16 | 0.013 | 0.213 | 0.271 | 0.393  | 0.530  | 0.542  | 0.619  |
| MAP + Peptide 17 | 0.047 | 0.061 | 0.105 | 0.154  | 0.182  | 0.284  | 0.335  |
| MAP + Peptide 18 | 0.047 | 0.115 | 0.238 | 0.398  | 0.540  | 0.633  | 0.624  |
| MAP + Peptide 19 | 0.008 | 0.145 | 0.383 | 0.453  | 0.543  | 0.610  | 0.616  |
| MAP + Peptide 20 | 0.033 | 0.097 | 0.187 | 0.229  | 0.375  | 0.559  | 0.618  |
| MAP + Peptide 21 | 0.050 | 0.121 | 0.149 | 0.233  | 0.384  | 0.453  | 0.598  |
| MAP + Peptide 22 | 0.038 | 0.091 | 0.160 | 0.199  | 0.418  | 0.421  | 0.694  |
| MAP + Peptide 23 | 0.032 | 0.100 | 0.146 | 0.208  | 0.423  | 0.454  | 0.642  |
| MAP + Peptide 27 | 0.047 | 0.117 | 0.159 | 0.231  | 0.401  | 0.489  | 0.653  |
| MAP + Peptide 28 | 0.043 | 0.090 | 0.249 | 0.301  | 0.345  | 0.434  | 0.581  |

B

| Condition        | Day 1 | Day 5 | Day 8 | Day 12 | Day 15 | Day 19 | Day 22 |
|------------------|-------|-------|-------|--------|--------|--------|--------|
| MAP (control)    | 0.050 | 0.217 | 0.313 | 0.415  | 0.451  | 0.530  | 0.606  |
| MAP + Peptide 29 | 0.047 | 0.146 | 0.186 | 0.343  | 0.381  | 0.493  | 0.581  |
| MAP + Peptide 30 | 0.037 | 0.194 | 0.272 | 0.274  | 0.461  | 0.532  | 0.666  |
| MAP + Peptide 31 | 0.028 | 0.122 | 0.193 | 0.387  | 0.368  | 0.525  | 0.605  |
| MAP + Peptide 35 | 0.047 | 0.127 | 0.180 | 0.199  | 0.414  | 0.483  | 0.490  |
| MAP + Peptide 36 | 0.023 | 0.137 | 0.163 | 0.319  | 0.394  | 0.518  | 0.588  |
| MAP + Peptide 38 | 0.046 | 0.176 | 0.188 | 0.212  | 0.308  | 0.491  | 0.602  |
| MAP + Peptide 39 | 0.031 | 0.156 | 0.215 | 0.254  | 0.363  | 0.466  | 0.459  |
| MAP + Peptide 42 | 0.017 | 0.165 | 0.257 | 0.287  | 0.317  | 0.402  | 0.511  |
| MAP + Peptide 43 | 0.043 | 0.136 | 0.146 | 0.244  | 0.453  | 0.558  | 0.571  |
| MAP + Peptide 47 | 0.018 | 0.110 | 0.167 | 0.275  | 0.387  | 0.523  | 0.621  |
| MAP + Peptide 48 | 0.038 | 0.154 | 0.176 | 0.343  | 0.458  | 0.546  | 0.565  |
| MAP + Peptide 49 | 0.045 | 0.157 | 0.129 | 0.261  | 0.380  | 0.544  | 0.628  |
| MAP + Peptide 50 | 0.051 | 0.113 | 0.172 | 0.228  | 0.308  | 0.382  | 0.416  |
| MAP + Peptide 63 | 0.030 | 0.140 | 0.119 | 0.234  | 0.394  | 0.500  | 0.503  |
| MAP + Peptide 64 | 0.042 | 0.134 | 0.130 | 0.248  | 0.474  | 0.498  | 0.517  |
| MAP + Peptide 65 | 0.038 | 0.139 | 0.143 | 0.311  | 0.422  | 0.486  | 0.620  |
| MAP + Peptide 66 | 0.039 | 0.107 | 0.143 | 0.251  | 0.328  | 0.469  | 0.505  |
| MAP + Peptide 67 | 0.033 | 0.222 | 0.324 | 0.453  | 0.560  | 0.622  | 0.674  |
| MAP + Peptide 68 | 0.046 | 0.125 | 0.121 | 0.173  | 0.403  | 0.436  | 0.584  |
| MAP + Peptide 69 | 0.038 | 0.246 | 0.330 | 0.467  | 0.614  | 0.673  | 0.706  |
| MAP + Peptide 70 | 0.038 | 0.125 | 0.127 | 0.307  | 0.393  | 0.434  | 0.526  |
| MAP + Peptide 71 | 0.046 | 0.145 | 0.149 | 0.320  | 0.458  | 0.425  | 0.530  |
| MAP + Peptide 72 | 0.030 | 0.098 | 0.190 | 0.217  | 0.264  | 0.367  | 0.397  |
| MAP + Peptide 76 | 0.021 | 0.193 | 0.286 | 0.437  | 0.532  | 0.541  | 0.646  |
| MAP + Peptide 77 | 0.024 | 0.193 | 0.307 | 0.401  | 0.451  | 0.475  | 0.534  |

C

| Condition         | Day 1 | Day 5 | Day 8 | Day 12 | Day 15 | Day 19 | Day 22 |
|-------------------|-------|-------|-------|--------|--------|--------|--------|
| MAP (control)     | 0.052 | 0.228 | 0.345 | 0.438  | 0.516  | 0.557  | 0.631  |
| MAP + Peptide 78  | 0.055 | 0.198 | 0.268 | 0.381  | 0.427  | 0.480  | 0.549  |
| MAP + Peptide 82  | 0.036 | 0.094 | 0.101 | 0.128  | 0.131  | 0.146  | 0.147  |
| MAP + Peptide 83  | 0.042 | 0.135 | 0.174 | 0.205  | 0.194  | 0.212  | 0.209  |
| MAP + Peptide 84  | 0.045 | 0.151 | 0.199 | 0.240  | 0.391  | 0.514  | 0.532  |
| MAP + Peptide 86  | 0.037 | 0.186 | 0.314 | 0.451  | 0.489  | 0.568  | 0.597  |
| MAP + Peptide 87  | 0.030 | 0.075 | 0.121 | 0.151  | 0.212  | 0.314  | 0.331  |
| MAP + Peptide 88  | 0.062 | 0.105 | 0.148 | 0.177  | 0.242  | 0.311  | 0.415  |
| MAP + Peptide 90  | 0.029 | 0.162 | 0.248 | 0.376  | 0.482  | 0.591  | 0.594  |
| MAP + Peptide 91  | 0.059 | 0.197 | 0.292 | 0.400  | 0.490  | 0.525  | 0.598  |
| MAP + Peptide 92  | 0.037 | 0.189 | 0.313 | 0.368  | 0.477  | 0.533  | 0.573  |
| MAP + Peptide 97  | 0.039 | 0.213 | 0.323 | 0.376  | 0.428  | 0.524  | 0.578  |
| MAP + Peptide 98  | 0.051 | 0.164 | 0.215 | 0.275  | 0.379  | 0.454  | 0.500  |
| MAP + Peptide 99  | 0.043 | 0.229 | 0.346 | 0.440  | 0.490  | 0.531  | 0.625  |
| MAP + Peptide 100 | 0.040 | 0.273 | 0.374 | 0.417  | 0.477  | 0.526  | 0.623  |
| MAP + Peptide 102 | 0.038 | 0.248 | 0.372 | 0.467  | 0.530  | 0.591  | 0.687  |
| MAP + Peptide 103 | 0.036 | 0.298 | 0.349 | 0.471  | 0.512  | 0.580  | 0.692  |
| MAP + Peptide 108 | 0.031 | 0.058 | 0.094 | 0.196  | 0.230  | 0.341  | 0.351  |
| MAP + Peptide 109 | 0.031 | 0.218 | 0.336 | 0.444  | 0.491  | 0.555  | 0.637  |
| MAP + Peptide 110 | 0.038 | 0.081 | 0.140 | 0.167  | 0.260  | 0.358  | 0.412  |
| MAP + Peptide 111 | 0.032 | 0.261 | 0.390 | 0.440  | 0.510  | 0.596  | 0.625  |
| MAP + Peptide 112 | 0.043 | 0.227 | 0.323 | 0.425  | 0.501  | 0.542  | 0.670  |
| MAP + Peptide 114 | 0.037 | 0.083 | 0.161 | 0.181  | 0.205  | 0.291  | 0.387  |
| MAP + Peptide 115 | 0.032 | 0.199 | 0.295 | 0.380  | 0.468  | 0.571  | 0.633  |
| MAP + Peptide 116 | 0.033 | 0.211 | 0.318 | 0.381  | 0.503  | 0.539  | 0.613  |
| MAP + Peptide 117 | 0.043 | 0.247 | 0.311 | 0.386  | 0.480  | 0.539  | 0.676  |

**Table S1:** Screening of 75 peptides against MAP, done in 3 sets (A-C). Growth of MAP was monitored by measuring the absorbance at 600 nm. Values are average of two technical repeats.

Figure S1

(A)

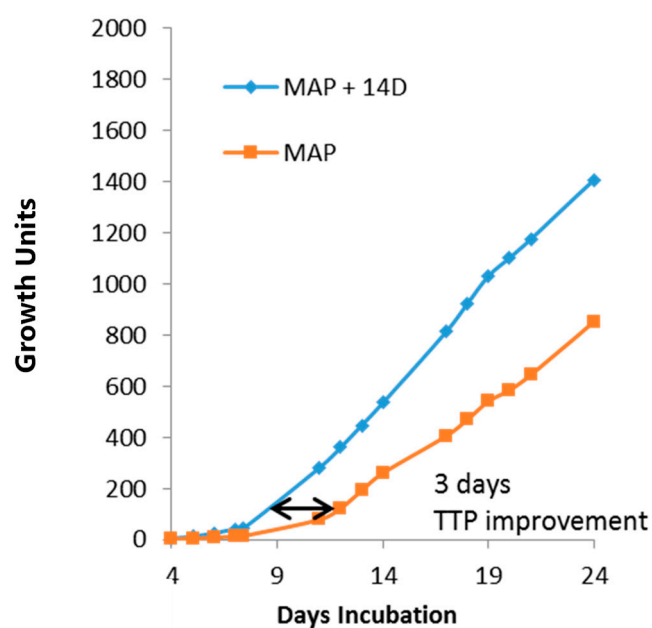

(B)

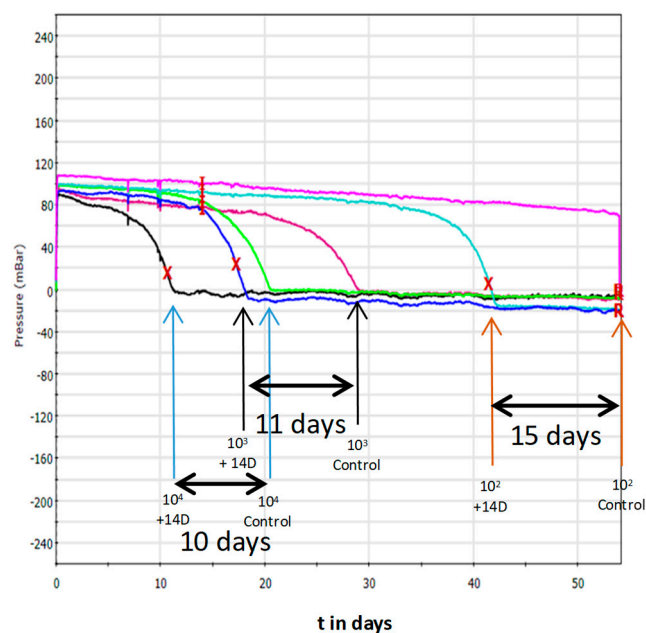

**Figure S1:** Peptide 14D at 1  $\mu\text{g/mL}$  was used to check if other machines that are routinely used in medical microbiology for the detection of mycobacteria show lower TTP as well. (A) BacT/Alert (Biomérieux, France) was used to detect MAP and (B) VersaTrek (ThermoFisher, US) were tested to detect MTB at different inocula,  $10^2$ ,  $10^3$  and  $10^4$ . Reduction of TTP in regards to the control is given in days.
